# Supplementary material
Source: publisher figshare collection journal article supplement (https://adisjournals.figshare.com/articles/dataset/_/6015626)
Supplement: Supplementary file 1 [file 1]

## Defining the Risk and Associated Morbidity and Mortality of Severe Respiratory Syncytial Virus Infection Among Preterm Infants Without Chronic Lung Disease or Congenital Heart Disease

Josep Figueras-Aloy • Paolo Manzoni • Bosco Paes • Eric A. F. Simões •  
Louis Bont • Paul A. Checchia • Brigitte Fauroux • Xavier Carbonell-  
Estrany

Infect Dis Ther. 2016 Dec;5(4):417-52

This slide deck represents the opinions of the authors. Sponsorship for this project was funded by AbbVie. Medical writing assistance for this study was provided by Strategen Limited. For a full list of acknowledgments and conflicts of interest for all authors of this article, please see the full text online. Copyright © The Authors 2017. Creative Commons Attribution Noncommercial License (CC BY-NC).

## Abbreviations

- BPD: Bronchopulmonary dysplasia
- CHD: Congenital heart disease
- CLD: Chronic lung disease
- ICU: Intensive care unit
- LOS: Length of stay
- MV: Mechanical ventilation
- NICU: Neonatal intensive care unit
- OR: Odds ratio
- RSV: Respiratory syncytial virus
- RSVH: Respiratory syncytial virus hospitalization
- SOE: Strength of Evidence
- wGA: weeks' gestational age

## REGAL 2: Associated morbidity and mortality of RSV in preterm infants without CLD/CHD

- The methodology followed that of the predetermined protocol outlined in REGAL 1. The target population consisted of:
  - Children ( $\leq 18$  years of age) born preterm ( $< 37$  wGA) without CLD or CHD
- Short-term outcomes of interest for this review included:
  - RSVH ( $< 28$ - $37$  wGA)
  - Hospital LOS ( $29$ - $< 37$  wGA)
  - ICU admission and LOS ( $29$ - $< 37$  wGA)
  - Oxygen requirement ( $29$ - $< 37$  wGA)
  - Need for and duration of MV and/or non-invasive ventilation ( $29$ - $< 37$  wGA)
  - Case-fatality rates ( $29$ - $< 37$  wGA)
  - Risk factors for severe RSVH ( $23$ - $35$  wGA)

**‘What is the predisposition and associated morbidity, long-term sequelae and mortality of preterm infants ( $< 37$  wGA) without CLD/BPD or CHD, overall, and split by gestational age segments, to severe RSV infection?’**

**‘What are the risk factors associated with RSVH?’**

## Systematic review

- 2,469 studies\* were identified of which 85 were included

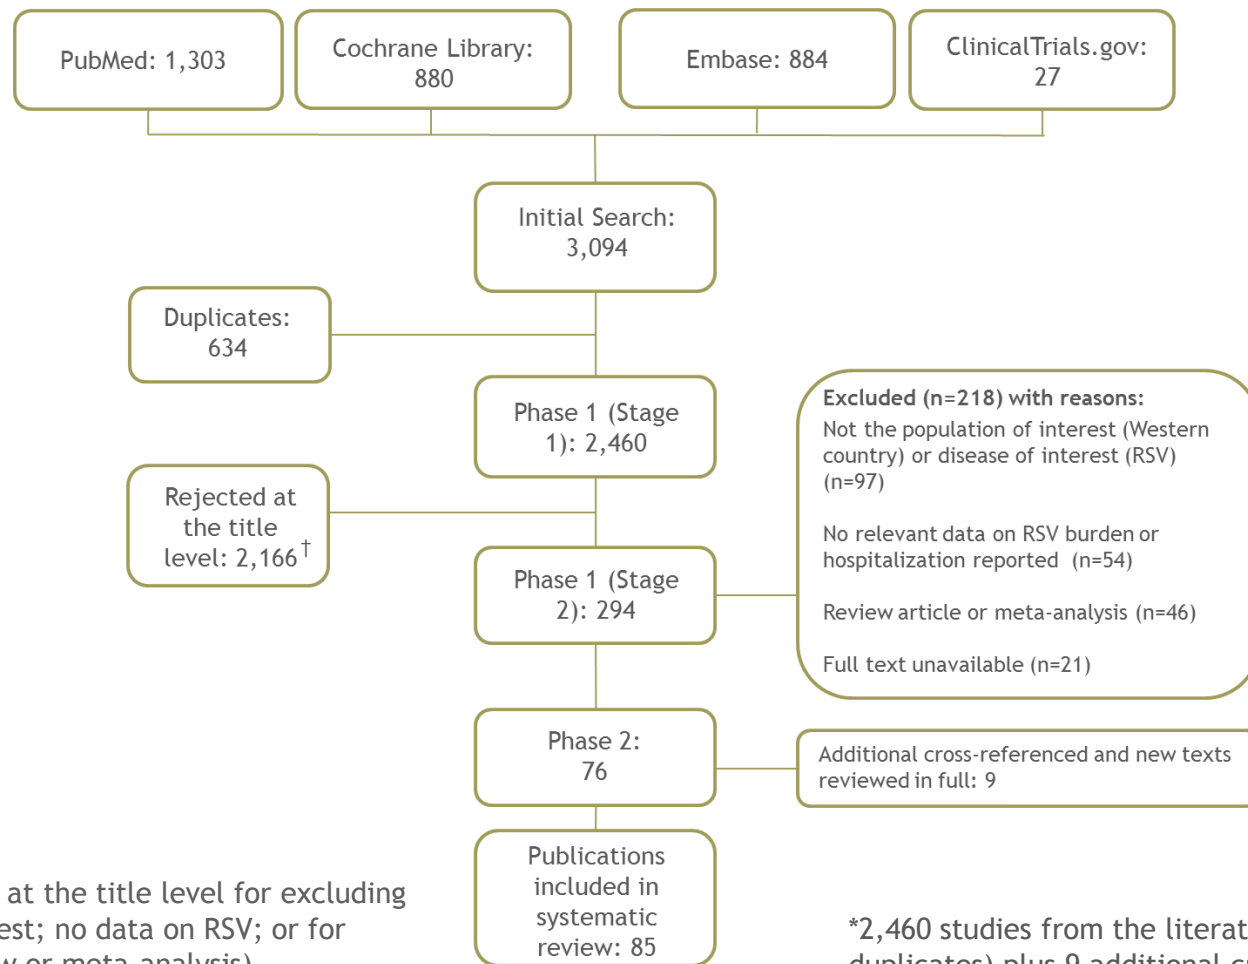

†Studies were rejected at the title level for excluding the population of interest; no data on RSV; or for article type (e.g. review or meta-analysis)

\*2,460 studies from the literature search (excluding duplicates) plus 9 additional cross-references

## Preterm infants were at greater risk of RSVH than term infants (high SOE)

Overall, comparative rates of RSVH tended to be

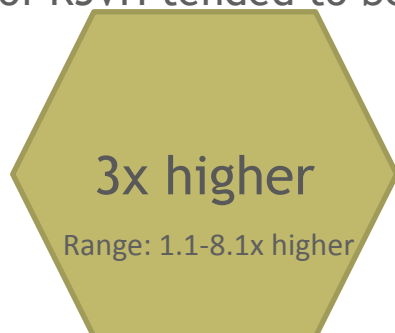

in preterm ( $\leq 36$  wGA) than full term infants ( $\geq 38$  wGA)

Overall reported RSVH rates for preterm infants ( $\leq 37$  wGA)  $\leq 2$  years

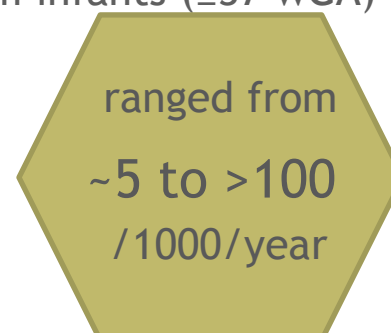

vs. ~10 to 20/1000/year in full term infants ( $\geq 38$  wGA)  $\leq 2$  years

The highest rates of RSVH were reported in infants with lower wGA

Gestational age-specific complications increased hospital resource utilization in preterm infants with RSVH (range 29-<37 wGA) (high SOE)

Median of

2-17  
days

in hospital

0.0-  
75.0%

were admitted  
to ICU

Median ICU LOS was

0-6  
days

54.5-  
73.4%

received oxygen

MV was given in

3.4-  
38.7%

of patients\*

\*A non-invasive  
ventilation rate of 15.2%  
was recorded in 1 study

Preterm infants with RSVH had high morbidity and high rate of health care resource utilization

## There were limited data on specific RSV-related mortality in preterm infants

- Overall case-fatality rates ranged from 0-5.7%
- Two studies were identified that addressed RSV-related mortality in preterm infants:
  - One study reported that low birth weight and/or prematurity ( $\leq 35$  wGA) independently increased risk of post-neonatal RSV-associated death
    - Case-fatality rate of 43/100,000 for  $\leq 35$  wGA infants without comorbidities born weighing  $< 2500$  g versus 20.3/100,000 for  $\geq 37$  infants without comorbidities weighing  $< 2500$  g
  - An overall mortality rate of 8.1% (196/2415) was found in RSVH infants (32-35 wGA) versus 1.6% (320/20,254) in healthy matched controls (OR: 5.5; 95% CI: 4.6-6.6,  $P = 0.001$ )

RSV may increase mortality rate in preterm infants

## Identification of infants requiring RSV immunoprophylaxis to reduce hospitalization in 23-35 wGA infants

### Factors associated with increased RSV risk in 23-32 wGA infants

- Asthma hospitalization
- Siblings

### Additional factors associated with increased RSV risk in 29-35 wGA infants\*

- Neurologic problems
- Male sex
- Discharge from October to December/ chronologic age <3 months at RSV season onset
- Lower gestational age
- Exposure to tobacco smoke
- Day care

\*Breastfeeding was found to have a protective effect in infants born  $\leq 33$  wGA. Data on the specific protective effect of breastfeeding in 32/33-35 wGA infants were conflicting



## Several independent RSVH risk factors were identified in 32/33-35 wGA infants (high SOE)

| Category   | Independent factors affecting preterm risk of RSVH                                                                                                                                    |
|------------|---------------------------------------------------------------------------------------------------------------------------------------------------------------------------------------|
| Exposure   | <ul style="list-style-type: none"><li>• Proximity of birth to RSV season</li><li>• Living with school age siblings</li><li>• Crowding at home</li><li>• Day care attendance</li></ul> |
| Social     | <ul style="list-style-type: none"><li>• Maternal smoking during pregnancy</li><li>• Exposure to smoke</li><li>• Reduced breast feeding</li></ul>                                      |
| Biological | <ul style="list-style-type: none"><li>• Small for gestational age</li><li>• Male sex</li><li>• Young maternal age</li><li>• Low maternal education</li></ul>                          |
| Medical    | <ul style="list-style-type: none"><li>• Familial wheezing and atopy</li><li>• Neonatal respiratory support</li><li>• Short hospital stay at birth</li></ul>                           |

The presence of  $\geq 1$  risk factor may increase an infant's susceptibility to RSVH

## Identification of infants requiring RSV immunoprophylaxis to reduce hospitalization in 32-35 wGA infants

- Predictive models have been developed to predict preterm infants (32/33-35 wGA) at high risk of RSVH (high SOE)
- Several predictive models identified preterm infants more at risk of RSVH using between **4 and 7** risk factors
- Areas under the receiver operating characteristics (ROC) curves presented **fair to good accuracy** ranging from 0.687 to 0.791 for six different models
- Age at the start of the **RSV season**, the presence of **siblings** and **day care attendance** were the most predictive variables for RSVH

| Key Statements/Findings                                                                                                                                                                                                                                                                                                                                            | Level of Evidence |
|--------------------------------------------------------------------------------------------------------------------------------------------------------------------------------------------------------------------------------------------------------------------------------------------------------------------------------------------------------------------|-------------------|
| Studies have shown that preterm infants, particularly those born at lower gestational ages, are at high risk for RSVH and tended to have higher rates of hospitalization for RSV compared with otherwise healthy term infants                                                                                                                                      | 1                 |
| RSVH rates for preterm infants ranged from ~5 per 1000 children to >100 per 1000, with the highest rates shown in the lowest gestational age infants                                                                                                                                                                                                               | 1                 |
| Compared to otherwise healthy/term infants, premature infants have longer median hospital stays; increased complication rates and increased risk for ICU admission                                                                                                                                                                                                 | 1                 |
| A number of independent risk factors associated with RSVH in preterm infants have been reported including exposure (e.g. proximity of birth to the RSV season, living with school-age siblings), social factors (e.g. maternal smoking during pregnancy or environmental smoking, reduced breast feeding), and biological factors (e.g. male sex, familial asthma) | 1                 |
| Predictive models for RSVH in 32-35 wGA infants have been developed using 4 or 7 risk factors with areas under the ROC curves ranging from 0.687 to 0.791 (fair to good predictive accuracy)                                                                                                                                                                       | 1                 |

Preterm infants (<37 wGA) were at significant risk for severe RSV disease, which was associated with substantial morbidity

## Further development

- Key areas for research:
  - Identification of gestational age-specific prevalence and burden of RSV to confirm the vulnerability of these children
  - Prospective studies to explore the changing risk of RSVH during the first year of life in preterm infants
- Gestation-specific data are important for the planning of healthcare utilization and the use of prophylactic agents

## Acknowledgments

- Sponsorship and article processing charges for this study were funded by AbbVie. Dr Joanne Smith, Julie Blake and Dr Barry Rodgers-Gray, from Strategen Limited, undertook the systematic review following protocol approval by the authors.
- Julie Blake and Dr Barry Rodgers-Gray provided editorial assistance in the preparation of the published manuscript. Support for this assistance was funded by AbbVie.
- All named authors met the International Committee of Medical Journal Editors (ICMJE) criteria for authorship for the published manuscript, took responsibility for the integrity of the work as a whole, and gave final approval for the published version of the manuscript.

## Disclosures

The institute of Louis Bont received money for investigator initiated studies by MeMed, Astra Zeneca, AbbVie, and Janssen. The institute of Louis Bont received money for consultancy by Astra Zeneca, AbbVie, MedImmune, Janssen, Gilead and Novavax. Paul Checchia has acted as an expert advisor and speaker for AbbVie and has received honoraria in this regard. He has also received research Grant funding from AstroZeneca. Brigitte Fauroux has received compensation as a neonatology board member from Abbvie. Josep Figueras-Aloy has acted as an expert advisor and speaker for AbbVie and has received honoraria in this regard. Paolo Manzoni has acted as a speaker for AbbVie, and as an expert advisor for AbbVie, TEVA, MedImmune, AstraZeneca, Janssen, and has received honoraria in this regard. Bosco Paes has received research funding from AbbVie Corporation and compensation as an advisor or lecturer from AbbVie and MedImmune. Eric Simões has received Grant funding to his institution from MedImmune Inc, Glaxo Smith Kline Inc, and received consultancy fees to the institution, from Abbvie. Xavier Carbonell-Estrany has acted as an expert advisor and speaker for AbbVie and has received honoraria in this regard.

## Copyright

Copyright © The Authors 2017.

This slide deck is distributed under the terms of the Creative Commons Attribution Noncommercial License which permits any noncommercial use, distribution, and reproduction in any medium, provided the original author(s) and the source are credited.
